# Supplementary material for: Using aquatic animals as partners to increase yield and maintain soil nitrogen in the paddy ecosystems
Source: eLife. 2022 Feb 22;11:e73869. doi: 10.7554/eLife.73869 (PMC8863371; doi:10.7554/eLife.73869)
Supplement: Appendix 1—figure 1—source data 1. [file elife-73869-app1-fig1-data1.xlsx]

## Sheet: Sheet1
Appendix 1-figure 1
Systems	rice-carp					rice-crab					rice-turtle
Treatments	RM		RA			RM		RA			RM		RA
	soil total N（g/kg）	se	soil total N（g/kg）	se		soil total N（g/kg）	se	soil total N（g/kg）	se		soil total N（g/kg）	se	soil total N（g/kg）	se
before	1.703		1.459		before	1.51101		1.52378		before	1.323		1.331
	1.617		1.679			1.56916		1.61101			1.288		1.425
	1.596		1.455			1.57643		1.59647			1.294		1.159
	1.563		2.092			1.64185		1.53832			1.233		1.517
						1.52555		1.55286			1.255		1.258
after	1.833		1.072								1.212		1.202
	1.583		2.127		after	1.40879		1.526
	1.082		1.429			1.39949		1.5185		after	1.396		1.376
	1.8125		2.471			1.64319		1.54954			1.156		1.484
						1.44869		1.45797			1.34		1.41
t	0.251221		-0.533323			1.51043		1.7201			1.486		1.366
P	0.817868		0.630792								1.34		1.277
					t	1.70471		0.212985			1.495		1.474
					P	0.16345		0.841753
										t	-1.63967		-1.27903
										P	0.161999		0.257029
