# Supplementary material for: Using aquatic animals as partners to increase yield and maintain soil nitrogen in the paddy ecosystems
Source: eLife. 2022 Feb 22;11:e73869. doi: 10.7554/eLife.73869 (PMC8863371; doi:10.7554/eLife.73869)
Supplement: Appendix 1—figure 2—source data 1. [file elife-73869-app1-fig2-data1.xlsx]

## Sheet: Sheet1
Appendix 1-figure 2
Systems	rice-carp					rice-crab					rice-turtle
Treatments	RM		RA			RM		RA			RM		RA
	‰	se	‰	se		‰	se	‰	se		‰	se	‰	se
δ15N of rice（‰）	14.842	0.9041	209.239	11.6652		7.512	0.27749	20.7303	0.7329		7.441	0.22477	31.3859	0.61663
