# Supplementary material for: Using aquatic animals as partners to increase yield and maintain soil nitrogen in the paddy ecosystems
Source: eLife. 2022 Feb 22;11:e73869. doi: 10.7554/eLife.73869 (PMC8863371; doi:10.7554/eLife.73869)
Supplement: Appendix 1—figure 3—source data 1. [file elife-73869-app1-fig3-data1.xlsx]

## Sheet: Sheet1
Appendix 1-figure 3
			Before		after
			average(g/kg)	se	average(g/kg)	se
	Rice-carp	RM	0.64021	0.10999	0.56846	0.04925
		RA	0.63042	0.09118	0.57292	0.02909
	Rice-crab	RM	0.71974	0.02422	0.736	0.01853
		RA	0.72833	0.02345	0.799	0.05771
	Rice-turtle	RM	0.57833	0.01249	0.52438	0.02562
		RA	0.56333	0.01022	0.56274	0.01991
