# Supplementary material for: Using aquatic animals as partners to increase yield and maintain soil nitrogen in the paddy ecosystems
Source: eLife. 2022 Feb 22;11:e73869. doi: 10.7554/eLife.73869 (PMC8863371; doi:10.7554/eLife.73869)
Supplement: Figure 1—source data 1. [file elife-73869-fig1-data1.xlsx]

## Sheet: Sheet1
Figure 1a
Systems	rice-carp					rice-crab					rice-turtle
Treatments	RM		RA			RM		RA			RM		RA
Year	yield（t/ha）	se	yield（t/ha）	se		yield（t/ha）	se	yield（t/ha）	se		yield（t/ha）	se	yield（t/ha）	se
2017	4.80961	0.11925	5.60472	0.51663		10.6662	0.19405	10.8695	0.27407		7.22013	0.13191	7.77563	0.34537
2018	5.65843	0.36477	5.6612	0.17415		12.4403	0.13283	12.9304	0.28463		7.29309	0.03699	8.317	0.2019
2019	4.76869	0.09319	5.13712	0.14248		10.4289	0.11676	11.2256	0.4379		7.42225	0.11855	8.10138	0.30292
2020	5.40409	0.17727	6.12182	0.11397		12.3758	0.50362	13.1559	0.23434		7.6475	0.20814	7.95833	0.16706
Figure 1b
Systems	rice-carp					rice-crab					rice-turtle
Treatments	RM		RA			RM		RA			RM		RA
Year	soil total N（g/kg）	se	soil total N（g/kg）	se		soil total N（g/kg）	se	soil total N（g/kg）	se		soil total N（g/kg）	se	soil total N（g/kg）	se
2016	1.61975	0.02989	1.67125	0.1497		1.5648	0.02294	1.56449	0.01683		1.2675	0.01696	1.31533	0.05583
2017	1.75338	0.057	1.72825	0.18968		1.57352	0.02362	1.57321	0.01514		1.38888	0.02596	1.34872	0.03037
2018	1.67288	0.08918	1.80425	0.23658		1.526	0.01887	1.59032	0.03573		1.27221	0.03663	1.35816	0.05377
2019	1.58263	0.15259	1.74725	0.29856		1.51	0.06205	1.57302	0.01673		1.32254	0.02	1.42105	0.05929
2020	1.57763	0.17466	1.77475	0.31915		1.48212	0.04476	1.55442	0.04409		1.36883	0.05078	1.39783	0.03134
Figure 1c
Systems	rice-carp					rice-crab					rice-turtle
Treatments	RM		RA			RM		RA			RM		RA
Year	ANUE（%）	se	ANUE（%）	se		ANUE（%）	se	ANUE（%）	se		ANUE（%）	se	ANUE（%）	se
2017	79.0378	3.06013	78.0881	4.43157		77.0052	1.04681	82.6357	1.16539		66.6504	3.04262	75.9859	4.34581
2018	76.1551	3.79054	84.4155	4.33915		81.6313	2.20686	87.1969	0.83282		67.2599	2.34728	73.8967	2.31835
2019	77.7821	2.25712	79.1292	5.9499		73.285	2.55641	80.8146	0.59071		68.4756	2.80161	80.3483	1.19291
2020	73.2536	3.08341	72.051	2.0268		81.5737	3.2219	88.5396	2.20629		70.4322	2.30689	77.9871	2.71451
