# Supplementary material for: Using aquatic animals as partners to increase yield and maintain soil nitrogen in the paddy ecosystems
Source: eLife. 2022 Feb 22;11:e73869. doi: 10.7554/eLife.73869 (PMC8863371; doi:10.7554/eLife.73869)
Supplement: Figure 2—source data 1. [file elife-73869-fig2-data1.xlsx]

## Sheet: Sheet1
Figure 2
Systems	rice-carp					rice-crab					rice-turtle
Treatments	RM		RA			RM		RA			RM		RA
Year	weed biomass（g m-2）	se	weed biomass（g m-2）	se		weed biomass（g m-2）	se	weed biomass（g m-2）	se		weed biomass（g m-2）	se	weed biomass（g m-2）	se
2017	5.65843	0.36477	4.90973	0.69901		6.47013	0.44437	6.01373	0.90984		9.5121	1.1204	7.67033	1.37267
2018	5.46868	0.50937	2.50818	0.41155		6.54309	0.28273	4.35858	0.65265		8.75268	0.68245	5.0448	0.63014
2019	4.76869	0.09319	2.0933	0.4896		5.42225	0.36442	2.35795	0.41589		9.67885	1.36929	3.90518	1.01954
2020	4.5875	0.17764	0.335	0.03428		7.1475	0.42248	1.2156	0.09627		8.24805	1.3737	2.31113	0.54724
