# Supplementary material for: Using aquatic animals as partners to increase yield and maintain soil nitrogen in the paddy ecosystems
Source: eLife. 2022 Feb 22;11:e73869. doi: 10.7554/eLife.73869 (PMC8863371; doi:10.7554/eLife.73869)
Supplement: Figure 3—source data 1. [file elife-73869-fig3-data1.xlsx]

## Sheet: Sheet1
Figure 3
	average				se
Systems	rice-carp	rice-crab	rice-turtle		rice-carp	rice-crab	rice-turtle
Diet components	%	%	%
Feed	49.83	65.17	84		3.78	5.41	7.69
Field food	50.17	34.83	16		6.11	4.39	2.33
Systems	rice-carp		rice-crab		rice-turtle
The contribution of field food source	%	The contribution of field food source	%	The contribution of field food source	%
Phytoplankton	11.2	Algae	4	Zoobenthos	9.7
Algae	4.8	Weeds	6.3	POM	6.3
Azollaceae	6.7	Zoobenthos	24.6
Weeds	6.7
Zoobenthos	16.4
rice-carp	Phytoplankton	Algae	Azollaceae	Weeds	Zoobenthos	tubifex
av	11.2	4.8	6.7	6.7	16.4	4.37
se	2.06	1.15	0.89	1.07	2.96	0.91
rice-crab	Algae	Weeds	Zoobenthos
av	4	6.3	24.6
se	0.07	0.85	3.17
rice-turtle	Zoobenthos	tubifex	POM
av	9.7	1.7	4.6
se	1.35	0.04	0.09
