# Supplementary material for: Using aquatic animals as partners to increase yield and maintain soil nitrogen in the paddy ecosystems
Source: eLife. 2022 Feb 22;11:e73869. doi: 10.7554/eLife.73869 (PMC8863371; doi:10.7554/eLife.73869)
Supplement: Figure 4—source data 1. [file elife-73869-fig4-data1.xlsx]

## Sheet: Sheet1
Figure 4
Systems	rice-carp					rice-crab					rice-turtle
Treatments	RM		RA			RM		RA			RM		RA
Day	13C remaining (%)	se	13C remaining (%)	se		13C remaining (%)	se	13C remaining (%)	se		13C remaining (%)	se	13C remaining (%)	se
40	31.1281	0.1961	31.0094	0.3822		35.5231	1.0658	34.2656	0.5582		37.2531	0.195	34.315	0.5759
80	25.7169	0.3598	23.6723	0.486		32.3681	0.578	29.3631	0.4958		32.0719	0.2024	28.9537	0.7979
