# Supplementary material for: Using aquatic animals as partners to increase yield and maintain soil nitrogen in the paddy ecosystems
Source: eLife. 2022 Feb 22;11:e73869. doi: 10.7554/eLife.73869 (PMC8863371; doi:10.7554/eLife.73869)
Supplement: Figure 5—source data 1. [file elife-73869-fig5-data1.xlsx]

## Sheet: Sheet1
Figure 5a
Systems	rice-carp	rice-crab	rice-turtle			Systems	rice-carp		rice-crab		rice-turtle
The fate of feed-N	%	%	%			Total N in rice biomass	（g m-2）	se	（g m-2）	se	（g m-2）	se
Rice	19.22	35.13	13.02			From feed	1.26524	0.0948	0.3587	0.08856	1.12271	0.1022
Aquatic animal	22.79	7.57	42			Not from feed	2.86219	0.2514	3.37227	0.19884	4.52997	0.4105
Environment	57.99	57.3	44.98
Figure 5b
	average						se
Systems	rice-carp	rice-crab	rice-turtle			Systems	rice-carp	rice-crab	rice-turtle
The fate of feed-N	%	%	%
Rice	19.22	35.13	13.02			2.42	3.12	1.17
Aquatic animal	22.79	7.57	42			2.81	0.93	3.75
Environment	57.99	57.3	44.98			6.03	6.14	5.07
