# Supplementary material for: Using aquatic animals as partners to increase yield and maintain soil nitrogen in the paddy ecosystems
Source: eLife. 2022 Feb 22;11:e73869. doi: 10.7554/eLife.73869 (PMC8863371; doi:10.7554/eLife.73869)
Supplement: Figure 6—source data 1. [file elife-73869-fig6-data1.xlsx]

## Sheet: Sheet1
Figure 6a								Figure 6b
		Before		After						Before		After
Systems	Treatments	Soil δ15N (‰)	se	Soil δ15N (‰)	se			Systems	Treatments	Soil total N (g/kg)	se	Soil total N (g/kg)	se
rice-carp	RM	2.68675	0.10918	2.72825	0.29759			rice-carp	RM	1.74328	0.03035	1.75906	0.01309
	RA	2.67386	0.10866	3.55	0.38722				RA	1.68973	0.04769	1.88197	0.05059
rice-crab	RM	1.94	0.29054	1.9895	0.31592			rice-crab	RM	0.52667	0.01602	0.56236	0.01217
	RA	1.925	0.14842	2.87775	0.41689				RA	0.57833	0.01602	0.63153	0.00437
rice-turtle	RM	3.92317	0.07346	4.05033	0.035			rice-turtle	RM	1.4544	0.04056	1.44668	0.04192
	RA	3.97367	0.13992	4.54933	0.10486				RA	1.46293	0.02057	1.53633	0.02063
